# Supplementary material for: High-performance Ruddlesden–Popper two-dimensional perovskite solar cells via solution processed inorganic charge transport layers
Source: Royal Society of Chemistry journal article supplement (doi:10.1039/d2cp02033e), 2022-01-01
Supplement: d2cp02033e1.pdf [file d2cp02033e1.pdf]

## Supporting Information for

# **High-performance Ruddlesden–Popper two-dimensional perovskite solar cells based on solution processed inorganic charge transport layers**

Zhihai Liu<sup>a</sup>, Lei Wang<sup>b</sup>, Xiaoyin Xie<sup>c</sup>, Chongyang Xu<sup>d</sup>, Jianfeng Tang<sup>\*e</sup> and Wei Li<sup>\*e</sup>

<sup>a</sup>*School of Physics and Electronic Information, Yantai University, Yantai 264005, China*

<sup>b</sup>*School of Artificial Intelligence, Beijing Technology and Business University, Beijing, 100048, China*

<sup>c</sup>*School of Chemistry and Chemical Technology, Hubei Polytechnic University, Huangshi 435003, China*

<sup>d</sup>*Yantai Research Institute and Graduate School of HEU, Harbin Engineering University, Harbin 150001, China*

<sup>e</sup>*School of Chemistry and Materials Science, Hunan Agricultural University, Changsha 410128, China*

\*Correspondence: [weili@hunau.edu.cn](mailto:weili@hunau.edu.cn) (W. Li); [jftang@hunau.edu.cn](mailto:jftang@hunau.edu.cn) (J. Tang)

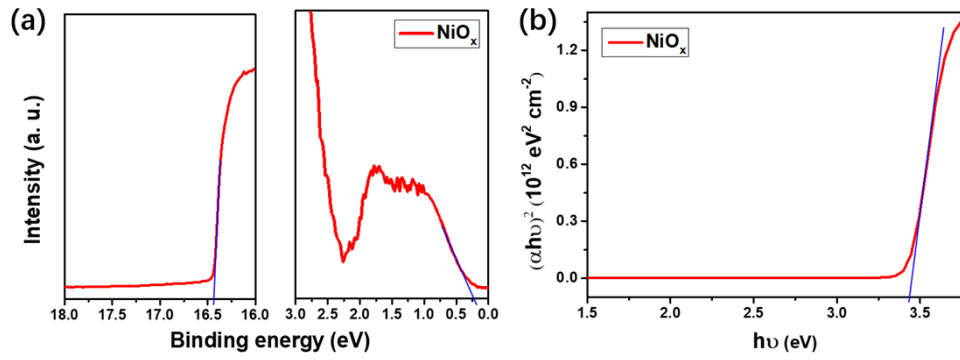

Fig. S1. (a) UPS spectrum and (b) absorption coefficient as a function of photon energy of the prepared  $\text{NiO}_x$  film.

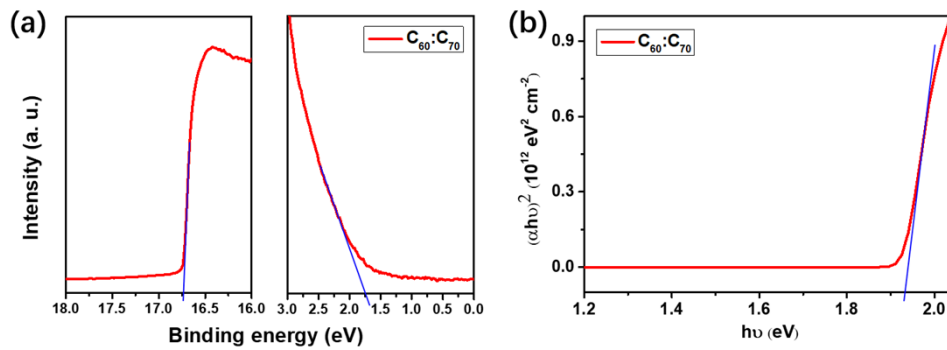

Fig. S2. (a) UPS spectrum and (b) absorption coefficient as a function of photon energy of the prepared  $\text{C}_{60}:\text{C}_{70}$  film.

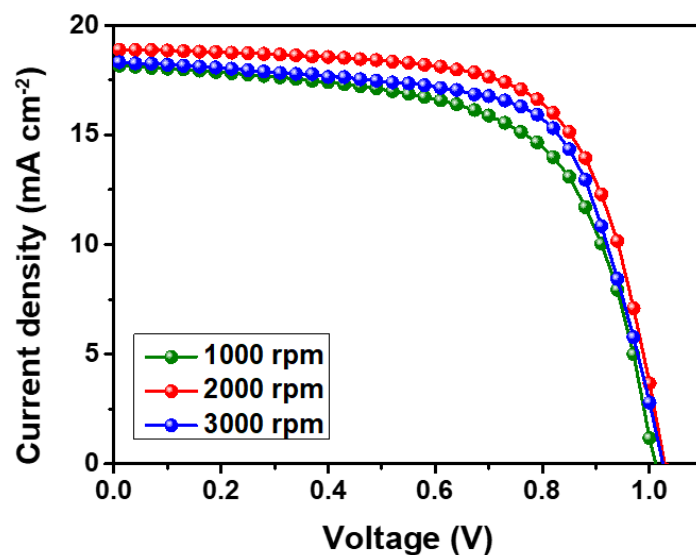

Fig. S3.  $J$ - $V$  characteristics of the PSCs using  $\text{NiO}_x$  and fullerene mixture ( $\text{C}_{60}:\text{C}_{70}$  =1:1) as the HTL and ETL, respectively. The fullerene mixture was spin coated from varying the rotating speed of 1000, 2000 and 3000 rpm.

Table S1. Device parameters for the PSCs using  $\text{NiO}_x$  and fullerene mixture ( $\text{C}_{60}:\text{C}_{70}$  =1:1) as the charge transport layers. The fullerene mixture was spin coated from varying the rotating speed of 1000, 2000 and 3000 rpm.

| Rotating speed | $V_{oc}$ (V) | $J_{sc}$ ( $\text{mA cm}^{-2}$ ) | FF (%) | PCE (%) |
|----------------|--------------|----------------------------------|--------|---------|
| 1000 rpm       | 1.01         | 18.2                             | 71.2   | 13.1    |
| 2000 rpm       | 1.01         | 18.9                             | 73.8   | 14.1    |
| 3000 rpm       | 1.00         | 18.4                             | 72.7   | 13.4    |

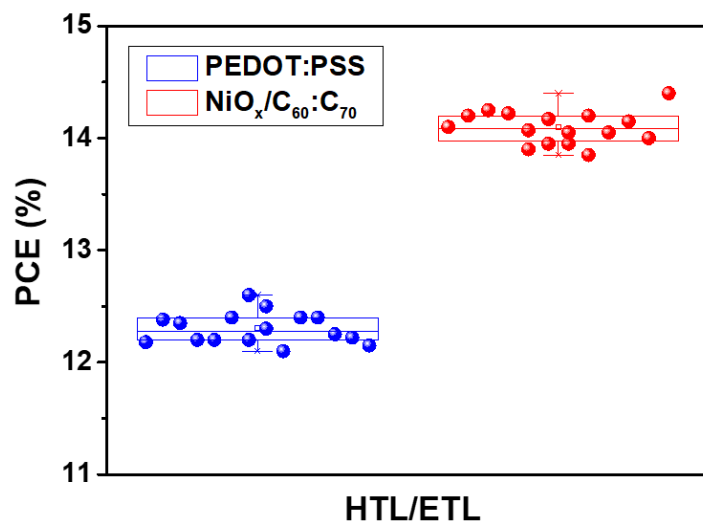

Fig. S4. PCE variations for PSCs using PEDOT:PSS/PCBM and NiO<sub>x</sub>/C<sub>60</sub>:C<sub>70</sub> as the charge transport layers.

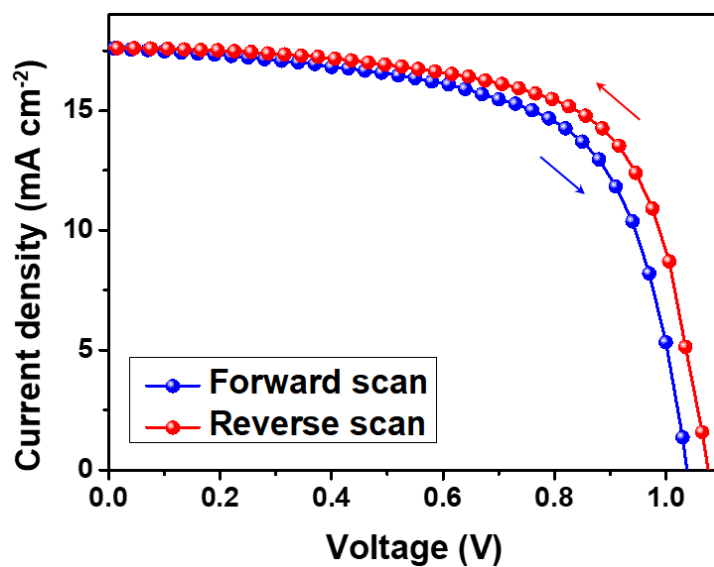

Fig. S5.  $J$ - $V$  characteristics (under forward and reverse scans) of the PSCs using PEDOT:PSS and PCBM as the HTL and ETL.

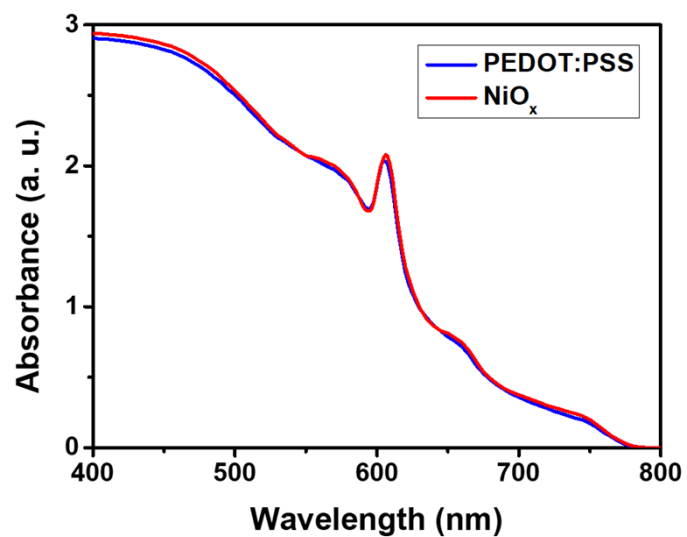

Fig. S6. Absorption spectra of the perovskite films formed on PEDOT:PSS and NiO<sub>x</sub>.

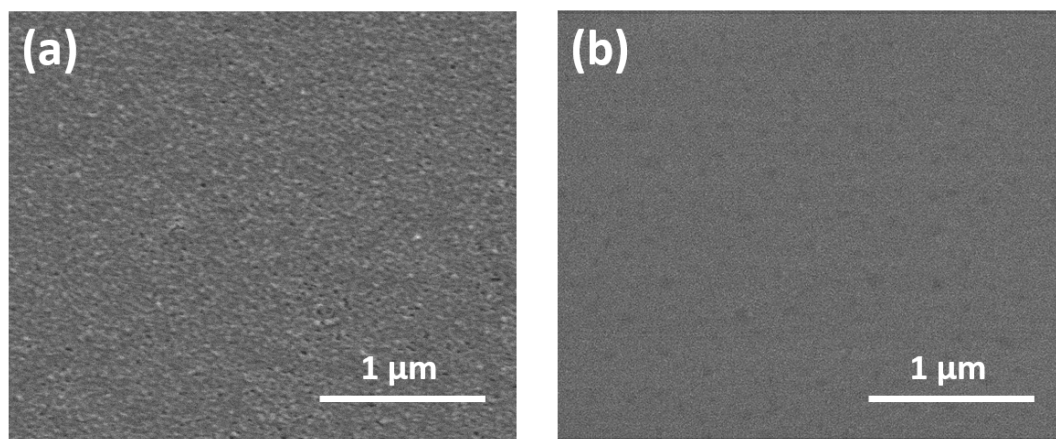

Fig. S7. Top-view SEM images of (a) underlying NiO<sub>x</sub> HTL and (b) fullerene mixture (C<sub>60</sub>:C<sub>70</sub> = 1:1) ETL.

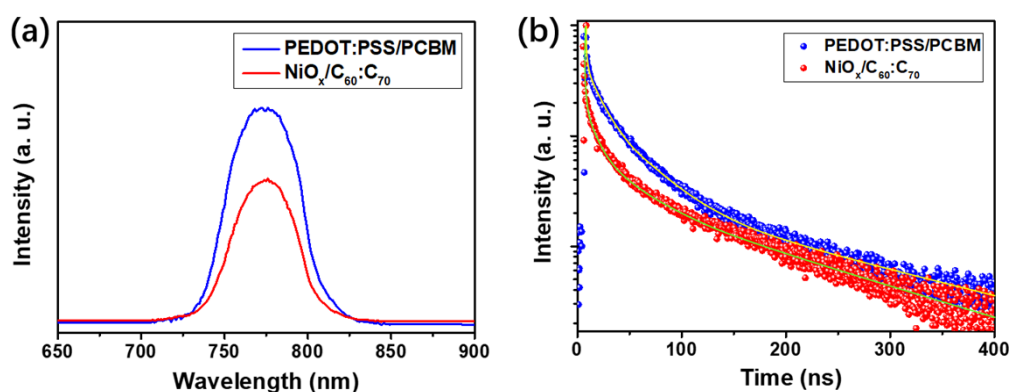

Fig. S8. PL (a) and TR-PL (b) spectra of NiO<sub>x</sub>/perovskite/C<sub>60</sub>:C<sub>70</sub> and PEDOT:PSS/perovskite/PCBM on glass.

Table S2. Fast decay component ( $\tau_1$ ) and slow decay component ( $\tau_2$ ) for the films of perovskite, NiO<sub>x</sub>/perovskite, NiO<sub>x</sub>/perovskite/C<sub>60</sub>:C<sub>70</sub> and PEDOT:PSS/perovskite/PCBM, which are obtained by fitting the TR-PL spectra.

| Configuration                                                 | $\tau_1$ (ns) | $\tau_2$ (ns) |
|---------------------------------------------------------------|---------------|---------------|
| Perovskite                                                    | 32.3          | 304.8         |
| NiO <sub>x</sub> /perovskite                                  | 11.2          | 82.6          |
| NiO <sub>x</sub> /perovskite/C <sub>60</sub> :C <sub>70</sub> | 6.8           | 38.2          |
| PEDOT:PSS/perovskite/PCBM                                     | 10.5          | 47.7          |
